# Supplementary material for: The Effects of Exogenous Salicylic Acid on Endogenous Phytohormone Status in Hordeum vulgare L. under Salt Stress
Source: MDPI journal article supplement (doi:10.3390/plants11050618), 2022-02-24
Supplement: s1 [file s1]

**Table S1.** Effects of salicylic acid (SA) pretreatment on endogenous cytokinin (CK) levels in the leaves and roots of *Hordeum vulgare* L. ‘Ince-04’ plants under control and saline conditions (150 and 300 mM). Values are mean  $\pm$  SE (n = 6).

| Treatment      | Leaf              |                  |                  |                  |                  |                  | Root             |                  |                  |                  |                  |                  |
|----------------|-------------------|------------------|------------------|------------------|------------------|------------------|------------------|------------------|------------------|------------------|------------------|------------------|
|                | C                 | 150              | 300              | SA               | SA150            | SA300            | C                | 150              | 300              | SA               | SA150            | SA300            |
| <i>tZ</i>      | 2.20 $\pm$ 0.18   | 1.58 $\pm$ 0.04  | 0.96 $\pm$ 0.25  | 1.46 $\pm$ 0.06  | 0.68 $\pm$ 0.26  | 0.62 $\pm$ 0.05  | 0.62 $\pm$ 0.00  | 0.62 $\pm$ 0.00  | 0.48 $\pm$ 0.00  | 0.66 $\pm$ 0.01  | 0.37 $\pm$ 0.10  | 0.27 $\pm$ 0.00  |
| <i>tZR</i>     | 0.55 $\pm$ 0.07   | 0.39 $\pm$ 0.03  | 0.27 $\pm$ 0.03  | 0.24 $\pm$ 0.00  | 0.40 $\pm$ 0.02  | 0.17 $\pm$ 0.01  | 0.74 $\pm$ 0.07  | 0.80 $\pm$ 0.08  | 0.48 $\pm$ 0.06  | 1.00 $\pm$ 0.08  | 0.20 $\pm$ 0.05  | 0.07 $\pm$ 0.00  |
| <i>tZ9G</i>    | 8.49 $\pm$ 0.32   | 6.28 $\pm$ 0.06  | 5.62 $\pm$ 0.19  | 5.93 $\pm$ 0.14  | 6.47 $\pm$ 0.01  | 5.28 $\pm$ 0.00  | 10.78 $\pm$ 1.11 | 4.60 $\pm$ 1.55  | 6.47 $\pm$ 2.36  | 8.77 $\pm$ 0.48  | 15.41 $\pm$ 6.77 | 3.77 $\pm$ 0.63  |
| <i>tZOG</i>    | 1.65 $\pm$ 0.20   | 1.62 $\pm$ 0.07  | 0.69 $\pm$ 0.07  | 1.02 $\pm$ 0.20  | 0.93 $\pm$ 0.19  | 0.64 $\pm$ 0.03  | 0.19 $\pm$ 0.01  | <LOD             | 0.68 $\pm$ 0.06  | <LOD             | <LOD             | <LOD             |
| <i>tZROG</i>   | 1.67 $\pm$ 0.12   | 0.79 $\pm$ 0.12  | 0.50 $\pm$ 0.02  | 0.38 $\pm$ 0.09  | 1.31 $\pm$ 0.07  | 0.99 $\pm$ 0.03  | 0.70 $\pm$ 0.35  | 0.85 $\pm$ 0.00  | 0.54 $\pm$ 0.03  | 1.31 $\pm$ 0.37  | 0.90 $\pm$ 0.07  | 0.65 $\pm$ 0.01  |
| <i>tZR'5MP</i> | 2.06 $\pm$ 0.07   | 0.67 $\pm$ 0.34  | 0.50 $\pm$ 0.26  | 0.57 $\pm$ 0.28  | 0.82 $\pm$ 0.11  | 0.43 $\pm$ 0.07  | 0.26 $\pm$ 0.00  | 0.43 $\pm$ 0.02  | 0.27 $\pm$ 0.05  | 0.58 $\pm$ 0.26  | 0.31 $\pm$ 0.07  | 0.25 $\pm$ 0.00  |
| <i>cZ</i>      | 7.39 $\pm$ 1.38   | 9.18 $\pm$ 0.12  | 13.73 $\pm$ 1.03 | 8.11 $\pm$ 1.09  | 14.77 $\pm$ 0.02 | 1.79 $\pm$ 0.08  | 1.25 $\pm$ 0.02  | 1.88 $\pm$ 0.08  | 1.88 $\pm$ 0.23  | 1.65 $\pm$ 0.28  | 1.25 $\pm$ 0.03  | 0.35 $\pm$ 0.03  |
| <i>cZR</i>     | 15.98 $\pm$ 3.11  | 19.94 $\pm$ 0.32 | 30.24 $\pm$ 0.64 | 16.19 $\pm$ 3.13 | 32.36 $\pm$ 0.19 | 4.00 $\pm$ 0.16  | 5.54 $\pm$ 1.84  | 7.50 $\pm$ 1.04  | 8.41 $\pm$ 0.89  | 7.62 $\pm$ 1.19  | 4.98 $\pm$ 0.05  | 0.42 $\pm$ 0.04  |
| <i>cZ9G</i>    | 0.11 $\pm$ 0.00   | 0.05 $\pm$ 0.00  | 0.06 $\pm$ 0.00  | 0.05 $\pm$ 0.00  | 0.09 $\pm$ 0.02  | 0.07 $\pm$ 0.01  | 0.12 $\pm$ 0.05  | 0.09 $\pm$ 0.00  | 0.38 $\pm$ 0.09  | 0.10 $\pm$ 0.02  | 0.18 $\pm$ 0.06  | 0.09 $\pm$ 0.00  |
| <i>cZOG</i>    | 75.35 $\pm$ 14.16 | 69.11 $\pm$ 1.37 | 84.91 $\pm$ 0.54 | 61.51 $\pm$ 3.44 | 62.35 $\pm$ 4.14 | 69.57 $\pm$ 2.50 | 41.98 $\pm$ 2.77 | 24.44 $\pm$ 1.66 | 29.46 $\pm$ 4.25 | 32.24 $\pm$ 1.13 | 42.73 $\pm$ 1.81 | 20.42 $\pm$ 0.33 |
| <i>cZROG</i>   | 5.96 $\pm$ 1.41   | 5.29 $\pm$ 0.00  | 18.98 $\pm$ 1.12 | 4.34 $\pm$ 0.05  | 10.10 $\pm$ 0.27 | 17.16 $\pm$ 0.43 | 55.39 $\pm$ 2.37 | 69.60 $\pm$ 0.19 | 54.83 $\pm$ 0.39 | 57.63 $\pm$ 0.63 | 61.63 $\pm$ 0.46 | 28.86 $\pm$ 1.42 |
| <i>cZR'5MP</i> | 1.40 $\pm$ 0.20   | 1.47 $\pm$ 0.26  | 6.79 $\pm$ 0.30  | 1.44 $\pm$ 0.47  | 2.68 $\pm$ 0.12  | 4.66 $\pm$ 0.31  | 1.58 $\pm$ 0.67  | 8.02 $\pm$ 2.41  | 7.35 $\pm$ 0.74  | 4.75 $\pm$ 0.51  | 4.13 $\pm$ 0.57  | 0.99 $\pm$ 0.11  |
| <i>iP</i>      | 0.98 $\pm$ 0.25   | 0.49 $\pm$ 0.03  | 0.64 $\pm$ 0.02  | 0.34 $\pm$ 0.00  | 0.84 $\pm$ 0.03  | 0.24 $\pm$ 0.00  | 0.15 $\pm$ 0.01  | 0.14 $\pm$ 0.01  | 0.17 $\pm$ 0.00  | 0.29 $\pm$ 0.10  | 0.15 $\pm$ 0.02  | 0.13 $\pm$ 0.01  |
| <i>iPR</i>     | 10.62 $\pm$ 2.20  | 13.13 $\pm$ 0.88 | 28.69 $\pm$ 0.83 | 12.21 $\pm$ 2.31 | 32.45 $\pm$ 1.09 | 2.70 $\pm$ 0.70  | 4.94 $\pm$ 0.88  | 7.75 $\pm$ 0.84  | 7.46 $\pm$ 0.06  | 11.51 $\pm$ 0.57 | 3.56 $\pm$ 0.19  | 0.82 $\pm$ 0.01  |
| <i>iP9G</i>    | 0.41 $\pm$ 0.10   | 0.65 $\pm$ 0.06  | 0.47 $\pm$ 0.15  | 0.52 $\pm$ 0.09  | 0.45 $\pm$ 0.01  | 0.37 $\pm$ 0.03  | 2.78 $\pm$ 0.35  | 1.50 $\pm$ 0.11  | 1.43 $\pm$ 0.07  | 1.67 $\pm$ 0.08  | 2.35 $\pm$ 0.02  | 0.60 $\pm$ 0.00  |
| <i>iPR'5MP</i> | 0.83 $\pm$ 0.20   | 0.20 $\pm$ 0.03  | 0.80 $\pm$ 0.06  | 0.08 $\pm$ 0.01  | 0.47 $\pm$ 0.06  | 0.27 $\pm$ 0.05  | 0.45 $\pm$ 0.01  | 1.40 $\pm$ 0.14  | 0.74 $\pm$ 0.01  | 1.58 $\pm$ 0.35  | 0.64 $\pm$ 0.02  | 0.28 $\pm$ 0.05  |

C, control (0 mM NaCl and SA); SA, 0.5 mM salicylic acid; 150, 150 mM NaCl; 300, 300 mM NaCl; LOD, limit of detection; *tZ*, *trans*-Zeatin; *tZR*, *trans*-Zeatin riboside; *tZ9G*, *trans*-Zeatin-9-glucoside; *tZOG*, *trans*-Zeatin-O-glucoside; *tZROG*, *trans*-zeatin-O-glucoside riboside; *tZR'5MP*, *trans*-Zeatin-9-riboside-5'-monophosphate; *cZ*, *cis*-Zeatin; *cZR*, *cis*-zeatin riboside; *cZ9G*, *cis*-Zeatin-9-glucoside; *cZOG*, *cis*-Zeatin-O-glucoside; *cZROG*, *cis*-Zeatin-O-glucoside riboside; *cZR'5MP*, *cis*-Zeatin-9-riboside-5'-monophosphate; *iP*, N6-isopentenyladenine *iPR*, N6-isopentenyladenosine; *iP9G*, N6-isopentenyladenine-9-glucose; *iPR'5MP*, N6-isopentenyladenosine-5'-monophosphate
